# Supplementary material for: Mechanics of the thorax in flies
Source: Oxford University Press journal article supplement (doi:10.1242/jeb.128363), 2017-04-15
Supplement: jeb128363supp.pdf [file jeb128363supp.pdf]

## Supplementary Videos

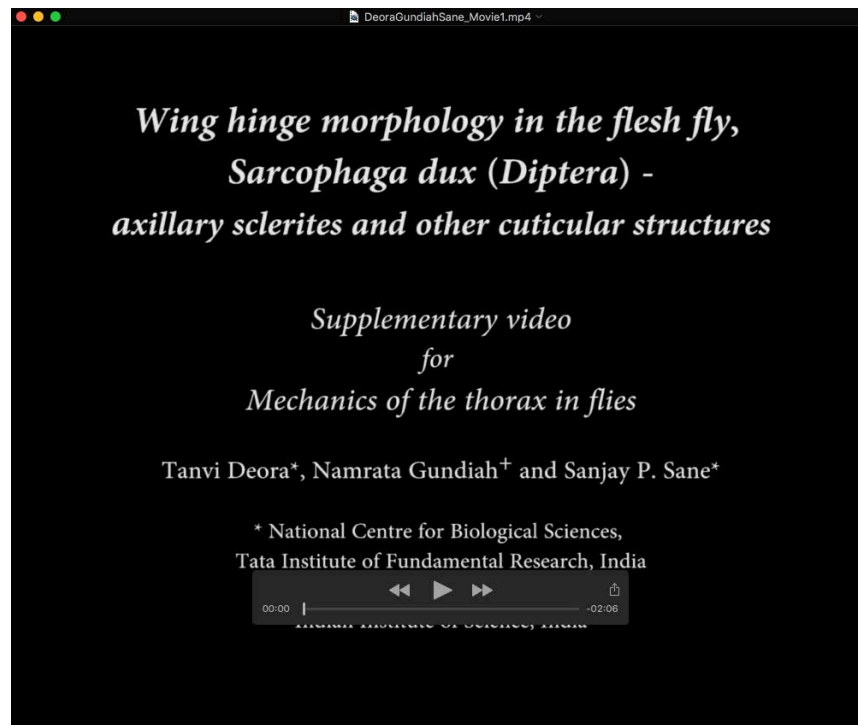

**Supplementary Movie 1: Wing hinge morphology in the flesh fly, *Sarcophaga dux* (Diptera) – axillary sclerites and other cuticular structures.** This video shows the structures involved in transmitting forces from the power muscles to the wings using contrast-enhanced X-ray microtomography of a flesh fly thorax.

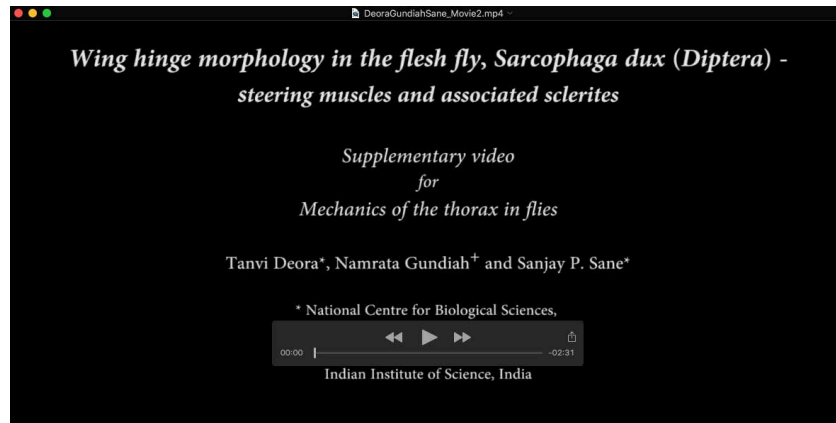

**Supplementary Movie 2: Wing hinge morphology in the flesh fly, *Sarcophaga dux* (Diptera) – steering muscles and associated sclerites.** This video shows all the steering muscles responsible for fine kinematic control of wing strokes using contrast enhanced X-ray microtomography of a flesh fly thorax.
